# Supplementary material
Source: Elsevier journal article supplement (https://lshtm-eprints-repo-prod.lshtm-eprints.cdl.cosector.com/4188/1/mmc1.pdf)
Supplement: mmc1 [file mmc1.pdf]

## Supplementary webappendix

This webappendix formed part of the original submission and has been peer reviewed. We post it as supplied by the authors.

Supplement to: Katharina Kranzer, Rein M G J Houben, Judith R Glynn, Linda-Gail Bekker, Robin Wood, Stephen D Lawn. Yield of HIV-associated tuberculosis during intensified case finding in resource-limited settings: a systematic review and meta-analysis. *Lancet Infect Dis* 2010; **10**: 93–102.

## Search strategy

| SET | Medline                                                                      | Embase                                                       | Global Health                           |
|-----|------------------------------------------------------------------------------|--------------------------------------------------------------|-----------------------------------------|
| 1   | tuberculosis                                                                 | tuberculosis                                                 |                                         |
| 2   |                                                                              | TUBERCULOSIS                                                 |                                         |
| 3   | Set 1 and 2 were combined with "or"                                          |                                                              |                                         |
| 4   |                                                                              | screening                                                    |                                         |
| 5   |                                                                              | MASS SCREENING                                               |                                         |
| 6   | screening                                                                    | (active or enhanced or intensified) adj1 (case adj1 finding) |                                         |
| 7   |                                                                              | CONTACT TRACING                                              |                                         |
| 8   |                                                                              | (household adj1 contact*) or (contact adj1 tracing)          |                                         |
| 9   | Set 4-8 were combined with "or "                                             |                                                              |                                         |
| 10  |                                                                              | ISONIAZID                                                    |                                         |
| 11  | Isoniazid                                                                    | isoniazid                                                    |                                         |
| 12  |                                                                              | (isoniazid adj1 preventive adj1 therapy) or ipt              |                                         |
| 13  | HIV/AIDS                                                                     | AIDS-RELATED OPPOTUNISTIC INFECTION, PREVENTION              | AIDS                                    |
| 14  | Set 10-13 were combined with "or"                                            |                                                              |                                         |
| 15  |                                                                              | PRISONS or PRISONERS                                         |                                         |
| 16  |                                                                              | inmate* or prison*                                           |                                         |
| 17  |                                                                              | MINING                                                       |                                         |
| 18  |                                                                              | miner*                                                       |                                         |
| 19  |                                                                              | REFUGEES                                                     |                                         |
| 20  | subgroups at high risks of Hiv infection or in congregated settings          | refugee* or (internally adj1 displaced)                      |                                         |
| 21  | HOSPITALS, PSYCHIATRIC                                                       | psychiatric adj1 hospital                                    | psychiatric adj1 hospital               |
| 22  | SUBSTANCE ABUSE, INTRAVENOUS                                                 | INTRAVENOUS DRUG ABUSE                                       | INJECTING DRUG ABUSE                    |
| 23  | (injecting adj1 drug adj1 user) or ivdu                                      | (injecting adj1 drug adj1 user) or ivdu                      | (injecting adj1 drug adj1 user) or ivdu |
| 24  |                                                                              | PROSTITUTION                                                 |                                         |
| 25  |                                                                              | prostitute* or csw or (commercial adj1 sex) or prostitution  |                                         |
| 26  |                                                                              | HOMOSEXUALITY, MALE                                          |                                         |
| 27  |                                                                              | msm or gay or homosexual*                                    |                                         |
| 28  |                                                                              | vct or (voluntary adj1 counselling adj1 testing)             |                                         |
| 29  | Set 15-28 were combined with "or"                                            |                                                              |                                         |
| 30  | Set 29, 14 and 9 were combined with "or"                                     |                                                              |                                         |
| 31  | Set 30 and 3 were combined with "and"                                        |                                                              |                                         |
| 32  | set 31 was limited to years "1994-2009"                                      |                                                              |                                         |
| 33  | set 32 and (search strategy "country") <sup>1</sup> were combined with "and" |                                                              |                                         |

Words written in capital letters were used as MeSH headings, the others were used as free text. Search terms which were the same for all databases are only mentioned once under the EMBASE heading

<sup>1</sup> search strategy "country" combined all middle and low income countries (MeSH heading and free text) with or

## Congregate settings

| Author                                     | Year of Publication | Year of study | Country      | N eligible | N screened | Symptom screen | Exam | TST                | CXR | antibiotics | S          | C          | TB prevalence   | Comments prevalence        |
|--------------------------------------------|---------------------|---------------|--------------|------------|------------|----------------|------|--------------------|-----|-------------|------------|------------|-----------------|----------------------------|
| <i>Prisons and correctional facilities</i> |                     |               |              |            |            |                |      |                    |     |             |            |            |                 |                            |
| Aerts <sup>22</sup>                        | 2000                | 1997-98       | Georgia      | 7630       | 7473*      | 1              |      |                    | (2) |             | 2(MMM)     | 3          | 5.99%           | 445 S+/C+; 3 S-/C+         |
| Salek <sup>23</sup>                        | 2001                | 1999          | Iran         | 2212       | 2212       | 1              | 2    |                    | 2   |             | 2          |            | 0.68%           | 10 S+; 5 clin              |
| Askarian <sup>24</sup>                     | 2001                | 1997          | Iran         | 319        | 319        |                |      | 1 (10)             | 2   |             | 3          | 4          | 2.50%           | 4 S+/C+/CXR+; 4 S-/C-/CXR+ |
| Yazdanpana <sup>25</sup>                   | 1999                |               | Iran         | 1634       | 1634       |                | 1    |                    | 2   |             | 2          |            | 0.12%           | 1 S+; 1 clin               |
| Rao <sup>26</sup>                          | 2004                | 2002          | Pakistan     | 4870       | 4870       | 1              |      |                    | 2   |             | 2(SSS)     |            | 0.66%           | 1 S+/CXR+; 31 S-/CXR+      |
| Shah <sup>27</sup>                         | 2003                | 2002          | Pakistan     | 386        | 386        | 1              |      |                    |     |             | 2(SMS)     |            | 3.89%           | 9 S+; 6 clin               |
| Noeske <sup>28</sup>                       | 2006                | 2003-04       | Cameroon     | 2830       | 2474*      | 1              |      |                    |     | 3           | 2(MM)      | 4(MM)      | 2.43%           | 60 S+ or C+                |
| Koffi <sup>29</sup>                        | 1997                | 1990-02       | Ivory Coast  | 1861       | 1861       | 1              | 1    |                    | 3   |             | 2          |            | 7.20%           | 108 S+; 26 S-/CXR+         |
| Wang <sup>30</sup>                         | 2003                | 2002          | Botswana     | 1173       | 1027*      | 1              |      |                    | (2) |             | 2(XXX)     | 2(XX)      | 1.85%           | 8S+; 11 S-                 |
| Banerjee <sup>31</sup>                     | 2000                | 1997          | Malawi       | 275        | 111*       | 1              | 1    |                    |     |             | 2(XXX)     |            | 3.60%           | 4 S+                       |
| Nyangulu <sup>32</sup>                     | 1997                | 1996          | Malawi       | 1315       | 900*       | 1              |      |                    | 4   | 3           | 2(SMS)     |            | 3.70%           | 18 S+; 15 S-/clin          |
| Habeenzu <sup>33 a</sup>                   | 2007                | 2000-01       | Zambia       | 6118*      | 1069       | (1)            |      |                    |     |             | 2(MMM)     | 2(MMM)     | 4.00%           | 168 S+/C+; 77 S-/C+        |
| Pillay <sup>34</sup>                       | 2003                |               | South Africa | 7341       | 7341       | 1              |      |                    |     |             | 2          | (2)        | 1.82%           |                            |
| Naranbat <sup>35</sup>                     | 2001                |               | Mongolia     | 4811       | 4021*      |                |      |                    | 1   |             | 2          |            | 2.04%           |                            |
| Jittimane <sup>36</sup>                    | 2007                | 2004-05       | Thailand     | 71594      | 71594      | 1              |      |                    |     |             | 2(SSS)     |            | 0.35%           | 254 S+                     |
| Sretrirutchai <sup>37</sup>                | 2002                | 1998          | Thailand     | 4751       | 4751       | 1              |      |                    | 2   |             | 3          | 3          | 0.57%           | 27 S+/CXR+                 |
| Sanchez <sup>38</sup>                      | 2007                | 2005          | Brazil       | 1377       | 1372*      |                |      |                    | 1   |             | 2(XX)      | 2(XX)      | 3.86%           | 36 S+/C+; 17 S-/C+         |
| Abraham <sup>39</sup>                      | 2006                | 2000-01       | Brazil       | 1122       | 1052*      | 1 <sup>a</sup> |      | 1 <sup>b</sup> (5) |     |             | 2(X or XX) | 2(X or XX) | 2% <sup>c</sup> | 8 S+/C+; 13 S-/C+          |
| Fournet <sup>40</sup>                      | 2006                | 2003          | Brazil       | 789        | 581*       | 1              |      |                    | 1   |             | 2(XX)      | 2(XX)      | 5.50%           | 17 S+; 12 S-/C+; 3 clin    |
| Sanchez <sup>41</sup>                      | 2005                | 2002          | Brazil       | 1171       | 1052*      | 1              |      |                    | 1   |             | 2(XX)      | 2(XX)      | 4.09%           | 14 S+; 14 S-/C+; 15 clin   |
| Ferreira <sup>42</sup>                     | 1996                | 1992-93       | Brazil       | 378        | 350*       | 1              | 1    |                    | 2   |             | 1(XX)      | 1(XX)      | 5.71%           | 2 S+; 15 S-/C+; 3 clin     |
| <i>Psychiatric hospitals</i>               |                     |               |              |            |            |                |      |                    |     |             |            |            |                 |                            |
| Van Duc <sup>43</sup>                      | 2008                | 2005          | Vietnam      | 300        | 300        | 1              |      |                    | 1   |             | 2(XX)      |            | 0.33%           | 1 S+                       |
| <i>Mines</i>                               |                     |               |              |            |            |                |      |                    |     |             |            |            |                 |                            |
| Steen <sup>44 d</sup>                      | 1997                | 1994          | Botswana     | 303        | 303        |                | 1    |                    | 1   |             | 2          |            | 1.32%           | 4 S+                       |
| Fielding <sup>45</sup>                     | 2008                | 2006-07       | South Africa | 13482      | 13482      | 1              |      |                    | 1   |             | 2(X)       | 2(X)       | 1.16%           |                            |
| Girdler-Brown <sup>46 d</sup>              | 2008                | 1999          | South Africa | 779        | 624*       | 1              |      |                    | 1   |             | 2(XXX)     | 2(XXX)     | 4.97%           | 18 S+ or C+; 13 clin       |
| Day <sup>47 e</sup>                        | 2006                | 1999-01       | South Africa | 1310       | 899*       | 1              | 1    |                    | 1   |             | 1(SS)      | 1(SS)      | 4.89%           | 35 C+; 4 C-/cli, 5 EPTB    |
| Corbett <sup>48</sup>                      | 2004                | 2000-01       | South Africa | 2248       | 1734*      | 1              |      |                    | 1   |             | 1(XX)      | 1(XX)      | 2.70%           | 9 S+/C+; 36 S-/C+; 2 clin  |
| Aungkasuvapala <sup>49</sup>               | 1995                | 1995          | Thailand     | 676        | 676        |                | 1    |                    | 1   |             | 1(XXX)     |            | 1.92%           | 8 S+/CXR+; 5 S-/CXR+       |

| <i>Refugees and internally displaced</i> |      |         |          |      |       |   |        |                |        |        |       |                            |
|------------------------------------------|------|---------|----------|------|-------|---|--------|----------------|--------|--------|-------|----------------------------|
| Weinstock <sup>50</sup>                  | 2001 | 1999    | Georgia  | 4000 | 931*  | 1 | 1 (10) | 2              | 3(MMM) | 3(MMM) | 0.54% | 2 C+; 1 C-/CXR+; 2 C?/CXR+ |
| Nelson <sup>51</sup>                     | 2003 | 2002-03 | Botswana | 2777 | 1615* | 1 |        | 3 <sup>f</sup> | 2(XXX) |        | 0.25% |                            |

<sup>a</sup>symptomatic prisoners were asked to present for screening, <sup>b</sup>asymptomatic prisoners had 1 smear and culture symptomatic prisoners and prisoners with positive TST had 2 smears and cultures, <sup>c</sup>3 of the active TB cases were on TB treatment, <sup>d</sup>studies in ex-miners, <sup>e</sup>study of HIV+ miners attending an HIV clinic, <sup>f</sup>CXR were performed for those unable to produce sputum

**VCT, PMTCT, high risk groups**

| Author                                 | Year of Publication | Year of study | Country      | N <sub>(HIV+)</sub> eligible | N <sub>(HIV+)</sub> screened | N <sub>(HIV-)</sub> eligible | N <sub>(HIV-)</sub> screened | Symptom screen | Exam | TS    | CXR | antibiotics | S       | C       | TB prevalence             | Comments prevalence                                         |
|----------------------------------------|---------------------|---------------|--------------|------------------------------|------------------------------|------------------------------|------------------------------|----------------|------|-------|-----|-------------|---------|---------|---------------------------|-------------------------------------------------------------|
| <b>VCT</b>                             |                     |               |              |                              |                              |                              |                              |                |      |       |     |             |         |         |                           |                                                             |
| Shetty <sup>52</sup>                   | 2008                | 2003-04       | India        | 4479                         | 4479                         | 5142                         | 5142                         | 1              |      |       |     |             | 2       |         | HIV+ 0.81%<br>HIV- 0.91%  | 51 S+; 20 S-; 12 EPTB                                       |
| Shah <sup>53</sup>                     | 2009                | 2005-06       | Ethiopia     | 453                          | 438*                         |                              |                              | 1              | 1    |       | 1   |             | 1(SMS)  | 1(SMS)  | 7.31%                     | 9 S+/C+; 18 S-/C+, 5 S+/C-                                  |
| Mugisha <sup>54</sup>                  | 2006                | 2001--03      | Uganda       | 7453                         | 6305*                        |                              |                              | 1              | 1    |       | 4   | 3           | 2       |         | 4.65%                     | 190 S+; 91 S-; 12 EPTB                                      |
| Aisu <sup>55</sup>                     | 1995                | 1991-92       | Uganda       | 1524*                        | 1424                         |                              |                              | 1              |      |       | 2   |             | 2       |         | 5.60%                     |                                                             |
| Godfrey-Faussett <sup>56</sup>         | 1995                |               | Zambia       | 181                          | 90*                          |                              |                              | 1              | 1    |       | 1   |             | 2       | 2       | 5.50%                     |                                                             |
| Naidoo <sup>57</sup>                   | 2002                | 2000-01       | South Africa | 2261                         | 1126*                        |                              |                              | 1              |      |       | 2   |             | 2       | 2       | 9.77%                     | 35 S+, 59 S+/C+, 39 clin PTB, 21 EPTB                       |
| Kanara, MMW <sup>58, 59</sup>          | 2008/2005           | 2001-03       | Cambodia     | 1979                         | 876*                         |                              |                              | 1              | 1    |       | (1) |             | 1       |         | 23.63%                    |                                                             |
| Chheng <sup>60</sup>                   | 2008                | 2005          | Cambodia     |                              | 124 <sup>a</sup>             |                              | 372 <sup>a</sup>             |                |      |       |     |             | 1(SMS)  | 1(SMS)  | HIV+ 16.13%<br>HIV- 2.42% | 19 S+; 10 C+                                                |
| Espinal <sup>61</sup>                  | 1995                | 1991-93       | Dom. Rep.    | 350                          | 200*                         | 364                          | 200*                         | 1              | 1    | 1 (5) | 2   |             | 2(XX X) |         | HIV+ 14.50%<br>HIV- 5.00% | 29 S+; 4 S-/clin; 6 EPTB                                    |
| Burgess <sup>62</sup>                  | 2001                | 1997          | Haiti        | 474                          | 474                          | 853                          | 853                          | 1              | 1    |       | 2   |             | 2(SM M) | 2(SM M) | HIV+ 10.55%<br>HIV- 3.05% | HIV+ 11 S+/C+; 14 S-/C+; 25 S-/C-<br>HIV- 17 S+/C+; 9 S-/C- |
| <b>PMTCT or postpartum care</b>        |                     |               |              |                              |                              |                              |                              |                |      |       |     |             |         |         |                           |                                                             |
| Gupta <sup>63 b</sup>                  | 2007                | 2002-05       | India        | 715                          | 688*                         |                              |                              | 1              |      | 1 (5) |     | 2           | 2       | 2       | 3.49%                     | 6 C+; 12 S+;<br>12 clin (16 pTB, 2 pTB/EPTB, 6 EPTB)        |
| Kali <sup>64</sup>                     | 2006                | 2003          | South Africa | 545                          | 370*                         |                              |                              | 1              |      |       |     |             | 2       | 2       | 2.12%                     | 8 S-/C+                                                     |
| Nachega <sup>65</sup>                  | 2003                | 2001          | South Africa | 438*                         | 318                          |                              |                              | 2              |      | 1 (5) |     | 2           | 3(XX X) | 3(XX X) | 2.30%                     | 6 C+; 5 S+; 2 clin (4 pTB, 9 EPTB)                          |
| <b>High risk groups (MSM and IVDU)</b> |                     |               |              |                              |                              |                              |                              |                |      |       |     |             |         |         |                           |                                                             |
| Khanani <sup>101</sup>                 | 2008                |               | Iran         | 700 <sup>c</sup>             | 700 <sup>c</sup>             |                              |                              | 1              |      |       |     |             | 2(XX X) |         | 6.00%                     |                                                             |

<sup>a</sup>The total number of VCT clients eligible for screening=1220 (no break-down according to HIV status), <sup>b</sup>Women were followed for a maximum of 12 months after giving birth 7 TB cases were found within the first 2 weeks of delivery, <sup>c</sup>300 IDUs and 200 MSMs (HIV positive and HIV negative) were screened

### Hospital, clinic based, home based screening

| Author                         | Year of Publication | Year of study | Country      | Setting              | N <sub>(HIV+)</sub> eligible | N <sub>(HIV+)</sub> screened | Symptom screen | Exam | TST | CXR | antibiotics | S       | C       | TB prevalence | Comments prevalence                                     |
|--------------------------------|---------------------|---------------|--------------|----------------------|------------------------------|------------------------------|----------------|------|-----|-----|-------------|---------|---------|---------------|---------------------------------------------------------|
| Swaminathan <sup>66</sup>      | 2000                | 1989-93       | India        | STD clinic attendees | 487                          | 175*                         | 1              | 1    |     | 1   |             | 2(XXXX) | 2(XXXX) | 9.71%         |                                                         |
| Dhungana <sup>67, 68</sup>     | 2008                | 2004-05       | Nepal        | Out- and inpatients  | 100                          | 100                          |                |      |     |     |             | 1(SMS)  | 1(SMS)  | 7.00%         | 1 S+/C-; 4 S+/C+; 2 S-/C+                               |
| Khun <sup>69</sup>             | 2002                | 2001          | Cambodia     | Home-based           | 773                          | 773                          | 1              | 1    |     | 1   |             | 2       | 2       | 13.58%        | 29 S+; 29 S-/C+, 46 S-/C-/clin; 20 EPTB                 |
| Kimerling <sup>70</sup>        | 2002                | 2000          | Cambodia     | Home-based           | 787                          | 441*                         |                |      |     |     |             | 1(S)    | 1(S)    | 9.30%         | 29 S+/C+; 12 S-/C+                                      |
| Ngowi <sup>71</sup>            | 2008                | 2006-07       | Tanzania     | HIV/ARV clinic       | 233                          | 233                          |                |      |     |     |             | 1(S)    | 1(S)    | 8.58%         | 8 S+/C+; 12 S-/C+                                       |
| Bakari/Mtei <sup>9, 72 a</sup> | 2008/2005           | 2001-03       | Tanzania     | HIV clinic           | 1176                         | 1176                         | 1              |      |     | 1   |             | 1(XXX)  | 1(XXX)  | 11.56%        | 2S+/C-; 13 S+/C+; 23 S-/C+; 98 S-/C-/clin               |
| Nakanjako <sup>73</sup>        | 2007                | 2005-06       | Uganda       | HIV clinic           | 2469                         | 2469                         | 1              |      |     | 2   |             | 2 (XXX) |         | 7.78%         |                                                         |
| Were/Moore <sup>74, 75</sup>   | 2007/2009           | 2003-05       | Uganda       | HIV/ARV clinic       | 1995                         | 1995                         | 1              |      |     | 4   | 3           | 2 (SMS) | 4       | 3.56%         | 14 S+; 53 S-/clin; 4EPTB                                |
| Gasana <sup>76</sup>           | 2008                | 2006          | Rwanda       | HIV clinic           | 629                          | 300*                         | 1              |      |     | 2   |             | 2       |         | 3.67%         |                                                         |
| Bassett <sup>77</sup>          | 2009                | 2007-08       | South Africa | ARV clinic           | 824                          | 824                          | 1              |      |     |     |             | 1       | 1       | 19.30%        | 14 S+/C+, 145 S-/C+                                     |
| Lawn <sup>10</sup>             | 2009                | 2007-08       | South Africa | ARV clinic           | 235                          | 235                          | 1              |      |     |     |             | 1(SS)   | 1 (SS)  | 24.68%        | 8 S+/C+, 50 S-/C+                                       |
| Mohammed <sup>78</sup>         | 2004                |               | South Africa | HIV clinic           | 140                          | 129*                         | 1              |      |     | 1   |             | 1(S)    | 1(S)    | 8.53%         | 6 S+/C+; 4S-/C+; 1 C-/clin                              |
| Reddy <sup>79</sup>            | 2008                |               | Peru         | HIV clinic           | 471                          | 435*                         |                |      |     |     |             | 1(XX)   | 1(XX)   | 6.21%         | 7 S+/C+, 20 S-/C+                                       |
| Silva <sup>80</sup>            | 2004                | 2001-02       | Brazil       | Inpatients           | 547                          | 547                          | 1              |      |     | 1   |             | 2       | 2       | 1.83%         | 3 S+/C+; 7 S-/C+                                        |
| Murcia <sup>81</sup>           | 2001                | 1999-00       | Colombia     | HIV clinic           | 286                          | 286                          |                |      |     |     |             | 1       | 1       | 1.40%         | 2 pTB; 2 EPTB                                           |
| Crespo <sup>82</sup>           | 1999                |               | Colombia     | social service       | 155                          | 155                          |                |      |     | 1   |             | 2       | 2       | 6.45%         | 1 pTB; 6 miliary TB<br>2 TB meningitis; 1 lymph node TB |

<sup>a</sup>inclusion criteria CD4 > 200

## Contact tracing

| Author                       | Year of Publication | Year of study | Country    | N(index) eligible | N(index) included | N(contact) eligible | N(contact) screened | Symptom screen | Exam | TST                  | CXR | antibiotics | S      | C      | TB prevalence | Comments prevalence                                           |
|------------------------------|---------------------|---------------|------------|-------------------|-------------------|---------------------|---------------------|----------------|------|----------------------|-----|-------------|--------|--------|---------------|---------------------------------------------------------------|
| Kuaban <sup>83</sup>         | 1996                | 1993-94       | Cameroon   | 336               | 104               | 416                 | 346*                | 1              |      | 1 (10)               | 1   |             | 2      |        | 14.45%        | 25 S+; 25 clin (25 cases in children <14)                     |
| Jackson-Sillah <sup>84</sup> | 2007                | 2002-04       | The Gambia | 317               | 317               | 2381                | 2174*               | 1              |      | 1 (10)               | 2   | 4           | 3      | 3      | 1.52%         | 6 S+/C+; 18 S-/C+; 6 clin (16 cases in children <14)          |
| Diatta <sup>85</sup>         | 2007                | 2003-04       | Senegal    | 30                | 30                | 601                 | 601                 | 2              | 2    | 1 (8)                | 2   |             | 3      |        | 2.66%         | 16 S+ (2 cases in children <15)                               |
| Guwatudde <sup>86</sup>      | 2003                | 1995-99       | Uganda     | 360               | 302               | 1206                | 1206                | 1              | 1    |                      | 1   |             | 2(XXX) | 2(XXX) | 4.23%         | 13 S+/C+; 9 S-/C+; 9 S+/C-; 16 clin (34 cases in children <6) |
| Zachariah <sup>87</sup>      | 2003                | 2001-02       | Malawi     | 87                | 87                | 461                 | 461                 | 1 <sup>a</sup> |      |                      |     |             | 2(SM)  |        | 1.74%         | 2 S+; 6 clin (4 cases in children <6)                         |
| Suggaravetsiri <sup>88</sup> | 2003                | 2000-02       | Thailand   | 499               | 459               | 1200                | 1192                | 1              | 1    | 1 (15)               | 2   |             | 2(MMM) | 3      | 3.75%         |                                                               |
| Becerra <sup>89</sup>        | 2005                | 1997-98       | Peru       | 208               | 208               | 1094                | 1094                | 1              |      |                      |     |             | 2(MM)  | 2(MM)  | 0.70%         |                                                               |
| Bayona <sup>90</sup>         | 2003                | 1996-99       | Peru       | 192               | 192               | 945                 | 945                 | 1              |      |                      |     |             | 2      |        | 0.01%         |                                                               |
| Carvalho <sup>91</sup>       | 2003                | 1995-97       | Brazil     | 191               | 86                | 371                 | 360*                | 1              |      | 1(10/5) <sup>b</sup> | 1   |             | 2      | 2      | 0.83%         |                                                               |
| Teixeira <sup>92</sup>       | 2001                | 1994-98       | Brazil     | 78 <sup>c</sup>   | 78                | 408*                | 364                 | 1              | 1    | 1 (10)               | 2   |             | 2      | 2      | 4.17%         |                                                               |

<sup>a</sup>children were screened with CXR followed by antibiotics, <sup>b</sup>cut-offs for HIV- individuals 10mm, cut off HIV+ individuals 5mm, <sup>c</sup>26 of the index cases had MDR TB

## Population based

| Author                    | Year of Publication | Year of study | Country      | N eligible | N screened | Symptom screen | Exam | TST | CXR | antibiotics | S      | C      | TB prevalence | Comments prevalence               |
|---------------------------|---------------------|---------------|--------------|------------|------------|----------------|------|-----|-----|-------------|--------|--------|---------------|-----------------------------------|
| Demissie <sup>93</sup>    | 2002                | 2001          | Ethiopia     | 12149      | 12149      | 1              |      |     |     |             | 2(SMS) |        | 0.17%         | 21 S+                             |
| Sekandi <sup>94</sup>     | 2009                | 2005          | Uganda       | 1000       | 930        | 1              |      |     |     |             | 2(SMM) |        | 3.50%         | 33 S+                             |
| Guwatudde <sup>95</sup>   | 2003                | 2001-02       | Uganda       | 1142       | 1142       | 1              |      |     | 2   |             | 2(SMM) | 2(SMM) | 0.70%         |                                   |
| Corbett <sup>96</sup>     | 2007                |               | Zimbabwe     | 10079      | 10079      |                |      |     |     |             | 1(SM)  | 1(SM)  | 0.65%         | 40 S+/C+, 26 S-/C+                |
| Corbett <sup>97</sup>     | 2007                | 2001          | Zimbabwe     | 4884       | 4668*      | 1              |      |     | 3   |             | 2(XXX) | 2(XXX) | 0.58%         | 6 S+/C+; 15 S-/C+; 6 clin         |
| den Boon <sup>98,99</sup> | 2006/2007           | 2002          | South Africa | 3971       | 2608*      |                |      |     | 1   |             | 1(S)   | 1(S)   | 1.11%         | 20 S+/C+; 7 S-/C+; 2 scanty smear |
| Wood <sup>11</sup>        | 2007                | 2005          | South Africa | 971        | 762*       |                |      |     |     |             | 1(MS)  | 1(MS)  | 1.57%         | 6 S+/C+; 6 S-/C+                  |
| Pronyk <sup>100</sup>     | 2001                | 1999          | South Africa | 38251*     | 38127      | 1              |      |     |     |             | 2(SM)  | 2(X)   | 0.02%         | 6 S+/C+                           |

TST=Tuberculosis skin test, CXR= chest radiograph, S=sputum smear, C=sputum culture, clin=clinical, EPTP=extrapulmonary TB, pTB=pulmonary TB

Numbers indicate the order in which investigational screening tools were used in the screening process. For example the prison study by Aerts et al. performed symptom screening first indicated by a “1” in the symptom column. Individuals with symptoms had a CXR and sputum smears indicated by a “2” in these columns. All positive sputum smears were cultured indicated by a “3”.

Numbers in brackets in TST column indicate the cut-off for TST positivity. For example the study by Askarian et al. used a TST cut-off of 10mm.

A number in brackets in the CXR column indicates that CXRs were not performed on everybody (see prison study by Aerts et al.)

The number of letters in the smear and culture columns indicates the number of smears/cultures examined. “M” indicates early morning sputum, “S” indicates spot sputum and “X” indicates that the time when sputum was taken was unknown. In the prison study by Aerts et al. sputum smear examination were performed on 3 early morning sputum samples indicated by three “Ms”. Studies without alphabetical letters did not report the number or timing of sputum samples.

## References

9. Mtei L, Matee M, Herfort O, Bakari M, Horsburgh CR, Waddell R, et al. High rates of clinical and subclinical tuberculosis among HIV-infected ambulatory subjects in Tanzania. *Clin Infect Dis*. 2005 May 15;40(10):1500-7.
10. Lawn SD, Edwards SD, Kranzer K, Vogt M, Bekker LG, Wood R. Urine lipoarabinomannan assay for tuberculosis screening prior to ART: diagnostic yield and association with immune reconstitution disease. *Aids*, in press. 2009.
11. Wood R, Middelkoop K, Myer L, Grant AD, Whitelaw A, Lawn SD, et al. Undiagnosed tuberculosis in a community with high HIV prevalence: implications for tuberculosis control. *Am J Respir Crit Care Med*. 2007 Jan 1;175(1):87-93.
22. Aerts A, Habouzit M, Mschiladze L, Malakmadze N, Sadradze N, Menteshashvili O, et al. Pulmonary tuberculosis in prisons of the ex-USSR state Georgia: results of a nation-wide prevalence survey among sentenced inmates. *Int J Tuberc Lung Dis*. 2000 Dec;4(12):1104-10.
23. Salek S, Taghizadeh AR, Yazdanpanah M, Masjedi M, Velayati AA, Mohammadi HR, et al. Case finding of pulmonary tuberculosis in Ghasr prison. 32th World Conference on Lung Health of the IUATL Paris; 2001; November 1-4.
24. Askarian M, Karmi A, Sadeghi-Hassanabadi A. Tuberculosis among never-jailed drug abusers. *East Mediterr Health J*. 2001 May;7(3):461-4.
25. Yazdanpanah M. To assess the pulmonary tuberculosis among prisoners. 30th World Conference on Lung Health of the IUATL Madrid; 1999; September 14-18.
26. Rao NA. Prevalence of pulmonary tuberculosis in Karachi central prison. *J Pak Med Assoc*. 2004 Aug;54(8):413-5.
27. Shah SA, Mujeeb SA, Mirza A, Nabi KG, Siddiqui Q. Prevalence of pulmonary tuberculosis in Karachi juvenile jail, Pakistan. *East Mediterr Health J*. 2003 Jul;9(4):667-74.
28. Noeske J, Kuaban C, Amougou G, Piubello A, Pouillot R. Pulmonary tuberculosis in the Central Prison of Douala, Cameroon. *East Afr Med J*. 2006 Jan;83(1):25-30.
29. Koffi N, Ngom AK, Aka-Danguy E, Seka A, Akoto A, Fadiga D. Smear positive pulmonary tuberculosis in a prison setting: experience in the penal camp of Bouake, Ivory Coast. *Int J Tuberc Lung Dis*. 1997 Jun;1(3):250-3.
30. Rapid assessment of tuberculosis in a large prison system--Botswana, 2002. *MMWR Morb Mortal Wkly Rep*. 2003 Mar 28;52(12):250-2.
31. Banerjee A, Harries AD, Mphasa N, Yadid AE, Nyirenda T, Salaniponi FM. Prevalence of HIV, sexually transmitted disease and tuberculosis amongst new prisoners in a district prison, Malawi. *Trop Doct*. 2000 Jan;30(1):49-50.
32. Nyangulu DS, Harries AD, Kang'ombe C, Yaididi AE, Chokani K, Cullinan T, et al. Tuberculosis in a prison population in Malawi. *Lancet*. 1997 Nov 1;350(9087):1284-7.
33. Habeenzu C, Mitarai S, Lubasi D, Mudenda V, Kantenga T, Mwansa J, et al. Tuberculosis and multidrug resistance in Zambian prisons, 2000-2001. *Int J Tuberc Lung Dis*. 2007 Nov;11(11):1216-20.
34. Pillay M, Govender K, Reddy S, Roux L, Kagoro H, Sturm AW. The prevalence of tuberculosis in a South African prison. 34th World Conference on Lung Health of the IUATL Paris; 2003; October 29 - November 2.

35. Naranbat N, Otgontsetseg D, Nymadawa P, Tsogt G. Tuberculosis in Mongolian prisons. 32th World Conference on Lung Health of the IUATL Paris; 2001; November 1-4.
36. Jittimane S, Ngamtrairai N, White MC, Jittimane S. A prevalence survey for smear-positive tuberculosis in Thai prisons. *Int J Tuberc Lung Dis.* 2007 May;11(5):556-61.
37. Sretrirutchai S, Silapajakul K, Palittapongarnpim P, Phongdara A, Vuddhakul V. Tuberculosis in Thai prisons: magnitude, transmission and drug susceptibility. *Int J Tuberc Lung Dis.* 2002 Mar;6(3):208-14.
38. Sanchez AR, Massari V, Gerhardt G, Barreto AW, Cesconi V, Pires J, et al. [Tuberculosis in Rio de Janeiro prisons, Brazil: an urgent public health problem]. *Cad Saude Publica.* 2007 Mar;23(3):545-52.
39. Abrahao RM, Nogueira PA, Malucelli MI. Tuberculosis in county jail prisoners in the western sector of the city of Sao Paulo, Brazil. *Int J Tuberc Lung Dis.* 2006 Feb;10(2):203-8.
40. Fournet N, Sanchez A, Massari V, Penna L, Natal S, Biondi E, et al. Development and evaluation of tuberculosis screening scores in Brazilian prisons. *Public Health.* 2006 Oct;120(10):976-83.
41. Sanchez A, Gerhardt G, Natal S, Capone D, Espinola A, Costa W, et al. Prevalence of pulmonary tuberculosis and comparative evaluation of screening strategies in a Brazilian prison. *Int J Tuberc Lung Dis.* 2005 Jun;9(6):633-9.
42. Ferreira MM, Ferrazoli L, Palaci M, Salles PS, Medeiros LA, Novoa P, et al. Tuberculosis and HIV infection among female inmates in Sao Paulo, Brazil: a prospective cohort study. *J Acquir Immune Defic Syndr Hum Retrovirol.* 1996 Oct 1;13(2):177-83.
43. Van Duc L, Vree M, Cobelens FG, Phuc LT, Sy DN. High tuberculosis prevalence in a psychiatric hospital in Vietnam. *Int J Tuberc Lung Dis.* 2008 Jun;12(6):686-8.
44. Steen TW, Gyi KM, White NW, Gabosianelwe T, Ludick S, Mazonde GN, et al. Prevalence of occupational lung disease among Botswana men formerly employed in the South African mining industry. *Occup Environ Med.* 1997 Jan;54(1):19-26.
45. Fielding K, Chihota V, Lewis J, Luttig M, Crawford T, Popane F, et al. Factors associated with prevalent TB at screening prior to isoniazid preventive therapy. 39th World Conference on Lung Health of the IUATL Paris; 2008; October 16-20.
46. Girdler-Brown BV, White NW, Ehrlich RI, Churchyard GJ. The burden of silicosis, pulmonary tuberculosis and COPD among former Basotho goldminers. *Am J Ind Med.* 2008 Sep;51(9):640-7.
47. Day JH, Charalambous S, Fielding KL, Hayes RJ, Churchyard GJ, Grant AD. Screening for tuberculosis prior to isoniazid preventive therapy among HIV-infected gold miners in South Africa. *Int J Tuberc Lung Dis.* 2006 May;10(5):523-9.
48. Corbett EL, Charalambous S, Moloi VM, Fielding K, Grant AD, Dye C, et al. Human immunodeficiency virus and the prevalence of undiagnosed tuberculosis in African gold miners. *Am J Respir Crit Care Med.* 2004 Sep 15;170(6):673-9.
49. Aungkasuvapala N, Juengprasert W, Obhasi N. Silicosis and pulmonary tuberculosis in stone-grinding factories in Saraburi, Thailand. *J Med Assoc Thai.* 1995 Dec;78(12):662-9.
50. Weinstock DM, Hahn O, Wittkamp M, Sepkowitz KA, Khechinashvili G, Blumberg HM. Risk for tuberculosis infection among internally displaced persons in the Republic of Georgia. *Int J Tuberc Lung Dis.* 2001 Feb;5(2):164-9.
51. Nelson LJ, Davis AB, McCrann CH, Sugo CP, Sanoto R, Notha M, et al. Tuberculosis screening at a refugee camp in Botswana 2002-2003. 34th World Conference on Lung Health of the IUATL Paris; 2003; October 29 - November 2.
52. Shetty PV, Granich RM, Patil AB, Sawant SK, Sahu S, Wares DF, et al. Cross-referral between voluntary HIV counselling and testing centres and TB services, Maharashtra, India, 2003-2004. *Int J Tuberc Lung Dis.* 2008 Mar;12(3 Suppl 1):26-31.
53. Shah S, Demissie M, Lambert L, Ahmed J, Leulseged S, Kebede T, et al. Intensified tuberculosis case finding among HIV-infected persons from a voluntary counselling and testing center in Addis Ababa, Ethiopia. *J Acquir Immune Defic Syndr.* 2009 Apr 15;50(5):537-45.
54. Mugisha B, Bock N, Mermin J, Odeke RM, Miller B, Adatu-Engwau F, et al. Tuberculosis case finding and preventive therapy in an HIV voluntary counselling and testing center in Uganda. *Int J Tuberc Lung Dis.* 2006 Jul;10(7):761-7.
55. Aisu T, Raviglione MC, van Praag E, Eriki P, Narain JP, Barugahare L, et al. Preventive chemotherapy for HIV-associated tuberculosis in Uganda: an operational assessment at a voluntary counselling and testing centre. *Aids.* 1995 Mar;9(3):267-73.
56. Godfrey-Faussett P, Baggaley R, Mwinga A, Hosp M, Porter J, Luo N, et al. Recruitment to a trial of tuberculosis preventive therapy from a voluntary HIV testing centre in Lusaka: relevance to implementation. *Trans R Soc Trop Med Hyg.* 1995 Jul-Aug;89(4):354-8.
57. Naidoo P, Karpakis B, Maartens G, Schoenman H, Hausler HP. Active tuberculosis case-finding and isoniazid preventive therapy in HIV-positive clients at voluntary counselling and testing centres. 14th International AIDS Conference; Barcelona; 2002; July 7-12.

58. Kanara N, Cain KP, Laserson KF, Vannarith C, Sameourn K, Samnang K, et al. Using program evaluation to improve the performance of a TB-HIV project in Banteay Meanchey, Cambodia. *Int J Tuberc Lung Dis.* 2008 Mar;12(3 Suppl 1):44-50.
59. Screening HIV-infected persons for tuberculosis--Cambodia, January 2004-February 2005. *MMWR Morb Mortal Wkly Rep.* 2005 Nov 25;54(46):1177-80.
60. Chheng P, Tamhane A, Natpratan C, Tan V, Lay V, Sar B, et al. Pulmonary tuberculosis among patients visiting a voluntary confidential counseling and testing center, Cambodia. *Int J Tuberc Lung Dis.* 2008 Mar;12(3 Suppl 1):54-62.
61. Espinal MA, Reingold AL, Koenig E, Lavandera M, Sanchez S. Screening for active tuberculosis in HIV testing centre. *Lancet.* 1995 Apr 8;345(8954):890-3.
62. Burgess AL, Fitzgerald DW, Severe P, Joseph P, Noel E, Rastogi N, et al. Integration of tuberculosis screening at an HIV voluntary counselling and testing centre in Haiti. *Aids.* 2001 Sep 28;15(14):1875-9.
63. Gupta A, Nayak U, Ram M, Bhosale R, Patil S, Basavraj A, et al. Postpartum tuberculosis incidence and mortality among HIV-infected women and their infants in Pune, India, 2002-2005. *Clin Infect Dis.* 2007 Jul 15;45(2):241-9.
64. Kali PB, Gray GE, Violari A, Chaisson RE, McIntyre JA, Martinson NA. Combining PMTCT with active case finding for tuberculosis. *J Acquir Immune Defic Syndr.* 2006 Jul;42(3):379-81.
65. Nachega J, Coetzee J, Adendorff T, Msandiwa R, Gray GE, McIntyre JA, et al. Tuberculosis active case-finding in a mother-to-child HIV transmission prevention programme in Soweto, South Africa. *Aids.* 2003 Jun 13;17(9):1398-400.
66. Swaminathan S, Ramachandran R, Baskaran G, Paramasivan CN, Ramanathan U, Venkatesan P, et al. Risk of development of tuberculosis in HIV-infected patients. *Int J Tuberc Lung Dis.* 2000 Sep;4(9):839-44.
67. Dhungana GP, Ghimire P, Sharma S, Rijal BP. Characterization of mycobacteria in HIV/AIDS patients of Nepal. *JNMA J Nepal Med Assoc.* 2008 Jan-Mar;47(169):18-23.
68. Dhungana GP, Ghimire P, Sharma S, Rijal BP. Tuberculosis co-infection in HIV infected persons of Kathmandu. *Nepal Med Coll J.* 2008 Jun;10(2):96-9.
69. Khun KE, Tamura M, Yous BH, I. O, Mao TE. New TB screening service for people living with HIV/AIDS (PLWHA) in Phnom Penh. 33th World Conference on Lung Health of the IUATL Montréal; 2002; October 6-10.
70. Kimerling ME, Schuchter J, Chanthol E, Kunthy T, Stuer F, Glaziou P, et al. Prevalence of pulmonary tuberculosis among HIV-infected persons in a home care program in Phnom Penh, Cambodia. *Int J Tuberc Lung Dis.* 2002 Nov;6(11):988-94.
71. Ngowi BJ, Mfinanga SG, Bruun JN, Morkve O. Pulmonary tuberculosis among people living with HIV/AIDS attending care and treatment in rural northern Tanzania. *BMC Public Health.* 2008;8(341):341.
72. Bakari M, Arbeit RD, Mtei L, Lyimo J, Waddell R, Matee M, et al. Basis for treatment of tuberculosis among HIV-infected patients in Tanzania: the role of chest x-ray and sputum culture. *BMC Infect Dis.* 2008;8:32.
73. Nakanjako D, Mwesigire D, Wanyenze R, Sempira J, Ouma J, Senkusu J, et al. Reinforcement of TB screening identifies a high burden of pulmonary tuberculosis among HIV/AIDS patients in the Mulago Immune Suppression Clinic, Uganda. 4th IAS Conference; Sydney, Australia; 2007; July 22-25.
74. Moore D, Liechty C, Ekwaru P, Were W, Mwima G, Solberg P, et al. Prevalence, incidence and mortality associated with tuberculosis in HIV-infected patients initiating antiretroviral therapy in rural Uganda. *Aids.* 2007 Mar 30;21(6):713-9.
75. Were W, Moore D, Ekwaru P, Mwima G, Bunnell R, Kaharuzza F, et al. A simple screening tool for active tuberculosis in HIV-infected adults receiving antiretroviral treatment in Uganda. *Int J Tuberc Lung Dis.* 2009 Jan;13(1):47-53.
76. Gasana M, Vandebriel G, Kabanda G, Tsiouris SJ, Justman J, Sahabo R, et al. Integrating tuberculosis and HIV care in rural Rwanda. *Int J Tuberc Lung Dis.* 2008 Mar;12(3 Suppl 1):39-43.
77. Bassett I, Chetty S, Wand B, Giddy J, Losina E, Mazibuko M, et al. Intensive TB screening for HIV-infected patients ready to start ART in Durban, South Africa: limitations of WHO guidelines. 16th Conference on Retroviruses and Opportunistic Infections; Montreal; 2009; February 8-11.
78. Mohammed A, Ehrlich R, Wood R, Cilliers F, Maartens G. Screening for tuberculosis in adults with advanced HIV infection prior to preventive therapy. *Int J Tuberc Lung Dis.* 2004 Jun;8(6):792-5.
79. Reddy KP, Brady MF, Gilman RH, Coronel J, Navincopa M, Ticona E, et al. MODS for tuberculosis screening prior to isoniazid preventive therapy in HIV-infected persons. 39th World Conference on Lung Health of the IUATL Paris; 2008; October 16-20.
80. Silva RM, Teixeira PJ, Moreira JdS. Induced sputum for the diagnosis of lung disease in HIV-positive patients. *Jornal Brasileiro de Pneumologia Sociedade Brasileira de Pneumologia Tisiologia, Sao Paulo, Brazil.* 2004;30(5):452-8.
81. Murcia-Aranguren MI, Gomez-Marin JE, Alvarado FS, Bustillo JG, de Mendivelson E, Gomez B, et al. Frequency of tuberculous and non-tuberculous mycobacteria in HIV infected patients from Bogota, Colombia. *BMC Infect Dis.* 2001;1(21):21.

82. Crespo MP, Heli Corral R, Alzate A, Carrasquilla G, Sanchez N. [Mycobacterial infections in HIV-infected patients in Cali, Colombia]. *Rev Panam Salud Publica*. 1999 Oct;6(4):249-55.
83. Kuaban C, Koulla-Shiro S, Lekama Assiene T, Hagbe P. [Tuberculosis screening of patient contacts in 1993 and 1994 in Yaounde, Cameroon]. *Med Trop (Mars)*. 1996;56(2):156-8.
84. Jackson-Sillah D, Hill PC, Fox A, Brookes RH, Donkor SA, Lugos MD, et al. Screening for tuberculosis among 2381 household contacts of sputum-smear-positive cases in The Gambia. *Trans R Soc Trop Med Hyg*. 2007 Jun;101(6):594-601.
85. Diatta A, Toure NO, Kane YD, Ndiaye EH, Niang A, Thiam K, et al. [Familial tuberculosis: tracing the contacts of an infectious case]. *Rev Mal Respir*. 2007 Jan;24(1):32-40.
86. Guwatudde D, Nakakeeto M, Jones-Lopez EC, Maganda A, Chiunda A, Mugerwa RD, et al. Tuberculosis in household contacts of infectious cases in Kampala, Uganda. *Am J Epidemiol*. 2003 Nov 1;158(9):887-98.
87. Zachariah R, Spielmann MP, Harries AD, Gomani P, Graham SM, Bakali E, et al. Passive versus active tuberculosis case finding and isoniazid preventive therapy among household contacts in a rural district of Malawi. *Int J Tuberc Lung Dis*. 2003 Nov;7(11):1033-9.
88. Suggaravetsiri P, Yanai H, Chongsuvivatwong V, Naimpasan O, Akarasewi P. Integrated counseling and screening for tuberculosis and HIV among household contacts of tuberculosis patients in an endemic area of HIV infection: Chiang Rai, Thailand. *Int J Tuberc Lung Dis*. 2003 Dec;7(12 Suppl 3):S424-31.
89. Becerra MC, Pachao-Torreblanca IF, Bayona J, Celi R, Shin SS, Kim JY, et al. Expanding tuberculosis case detection by screening household contacts. *Public Health Rep*. 2005 May-Jun;120(3):271-7.
90. Bayona J, Chavez-Pachas AM, Palacios E, Llaro K, Sapag R, Becerra MC. Contact investigations as a means of detection and timely treatment of persons with infectious multidrug-resistant tuberculosis. *Int J Tuberc Lung Dis*. 2003 Dec;7(12 Suppl 3):S501-9.
91. Carvalho AC, DeRiemer K, Nunes ZB, Martins M, Comelli M, Marinoni A, et al. Transmission of *Mycobacterium tuberculosis* to contacts of HIV-infected tuberculosis patients. *Am J Respir Crit Care Med*. 2001 Dec 15;164(12):2166-71.
92. Teixeira L, Perkins MD, Johnson JL, Keller R, Palaci M, do Valle Dettoni V, et al. Infection and disease among household contacts of patients with multidrug-resistant tuberculosis. *Int J Tuberc Lung Dis*. 2001 Apr;5(4):321-8.
93. Demissie M, Zenebere B, Berhane Y, Lindtjorn B. A rapid survey to determine the prevalence of smear-positive tuberculosis in Addis Ababa. *Int J Tuberc Lung Dis*. 2002 Jul;6(7):580-4.
94. Sekandi JN, Neuhauser D, Smyth K, Whalen CC. Active case finding of undetected tuberculosis among chronic coughers in a slum setting in Kampala, Uganda. *Int J Tuberc Lung Dis*. 2009 Apr;13(4):508-13.
95. Guwatudde D, Zalwango S, Kanya MR, Debanne SM, Diaz MI, Okwera A, et al. Burden of tuberculosis in Kampala, Uganda. *Bull World Health Organ*. 2003;81(11):799-805.
96. Corbett EL, Bandason T, Cheung YB, Makamure B, Dauya E, Matambo R, et al. Undiagnosed infectious tuberculosis in Harare, Zimbabwe: HIV, past TB treatment and other risk factors. 38th World Conference on Lung Health of the IUATL Cape Town 2007; November 8-12.
97. Corbett EL, Bandason T, Cheung YB, Munyati S, Godfrey-Faussett P, Hayes R, et al. Epidemiology of tuberculosis in a high HIV prevalence population provided with enhanced diagnosis of symptomatic disease. *PLoS Med*. 2007 Jan;4(1):e22.
98. den Boon S, van Lill SW, Borgdorff MW, Enarson DA, Verver S, Bateman ED, et al. High prevalence of tuberculosis in previously treated patients, Cape Town, South Africa. *Emerg Infect Dis*. 2007 Aug;13(8):1189-94.
99. den Boon S, White NW, van Lill SW, Borgdorff MW, Verver S, Lombard CJ, et al. An evaluation of symptom and chest radiographic screening in tuberculosis prevalence surveys. *Int J Tuberc Lung Dis*. 2006 Aug;10(8):876-82.
100. Pronyk PM, Joshi B, Hargreaves JR, Madonsela T, Collinson MA, Mokoena O, et al. Active case finding: understanding the burden of tuberculosis in rural South Africa. *Int J Tuberc Lung Dis*. 2001 Jul;5(7):611-8.
